# Supplementary material
Source: PubMed Central journal article supplement (PMC8606034)
Supplement: NIHMS1629106-supplement-1.pdf [file NIHMS1629106-supplement-1.pdf]

# Supplemental figure 1

A

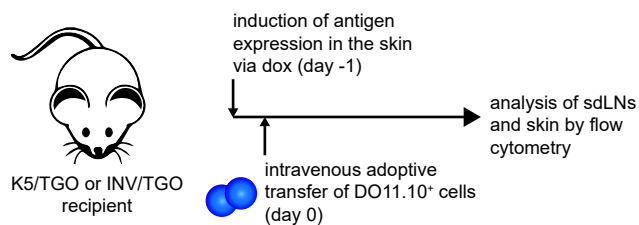

B

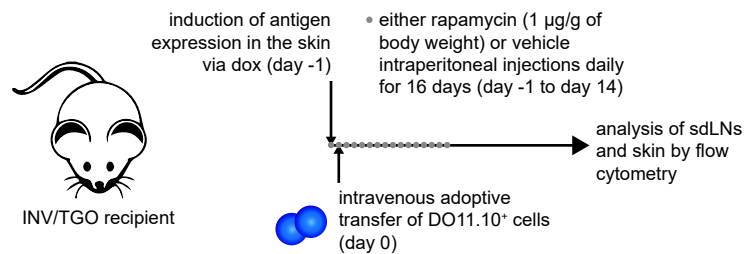

C

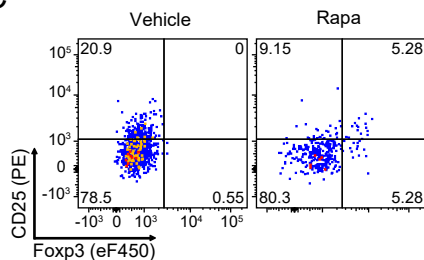

D

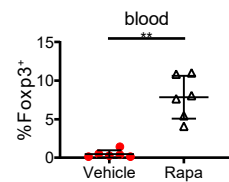

E

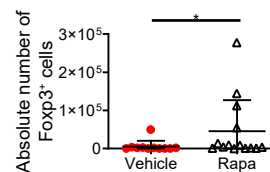

F

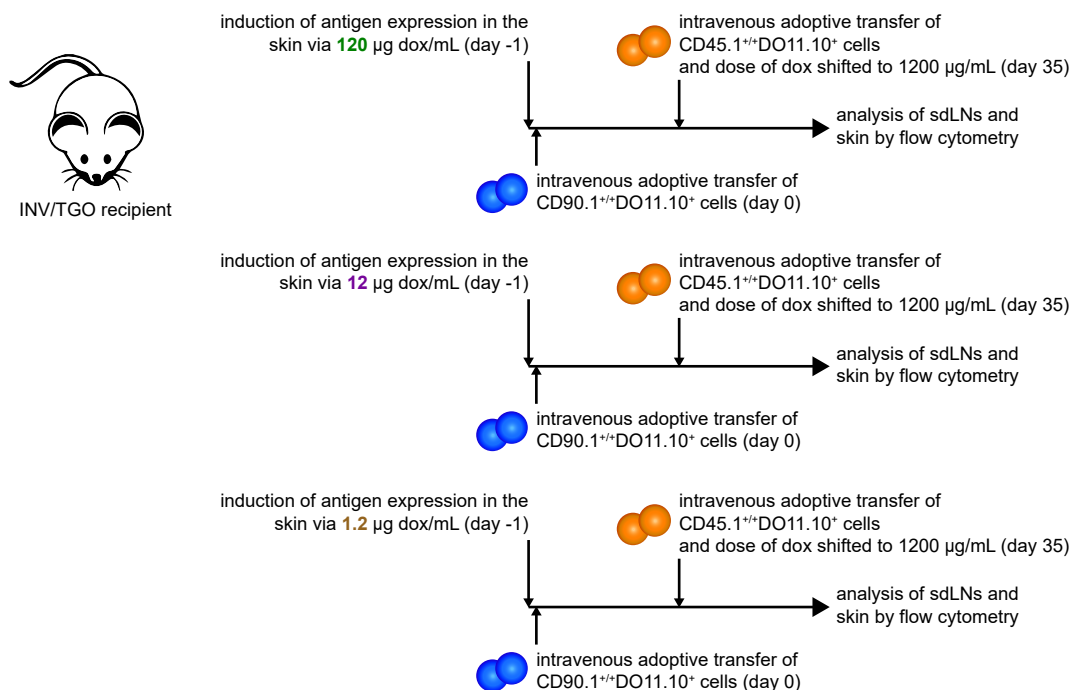

**Supplemental Figure 1: Experimental schemes and the modulation of S6 phosphorylation impacts peripheral Foxp3<sup>+</sup> cell generation.** (A) Scheme of experimental set up for Fig. 1. (B) Scheme of experimental set up for Fig. 2. (C, D and E) OVA expression in the skin was induced by 1200 µg dox/mL a day before the transfer of 0.5-0.9x10<sup>6</sup> LN cells from DO11.10 Rag2<sup>-/-</sup> mice into INV/TGO mice. Starting a day before adoptive transfer mice were treated with either rapamycin (1µg/g of body weight) or vehicle i.p. injections daily for 16 days. (C) 47 days after adoptive transfer, blood was taken by vena saphena bleeding, red blood cells were lysed and the expressions of Foxp3 and CD25 by DO11.10 cells were analyzed by flow cytometry. Representative flow plots of live gated CD4<sup>+</sup> DO11-TCR<sup>+</sup> T cells. (D) As (C), graphical summary of the percentages of Foxp3<sup>+</sup> DO11.10 cells in the blood on day 47 (N =6/group). (E) Absolute number of recovered Foxp3<sup>+</sup> DO11.10 cells from sdLNs between days 41-67 (vehicle) and 71-89 (rapa). Cumulative data from 4 experiments, N ≥ 11/group. (F) Scheme of experimental set up for Fig. 4C-E. Mean and SD is shown.

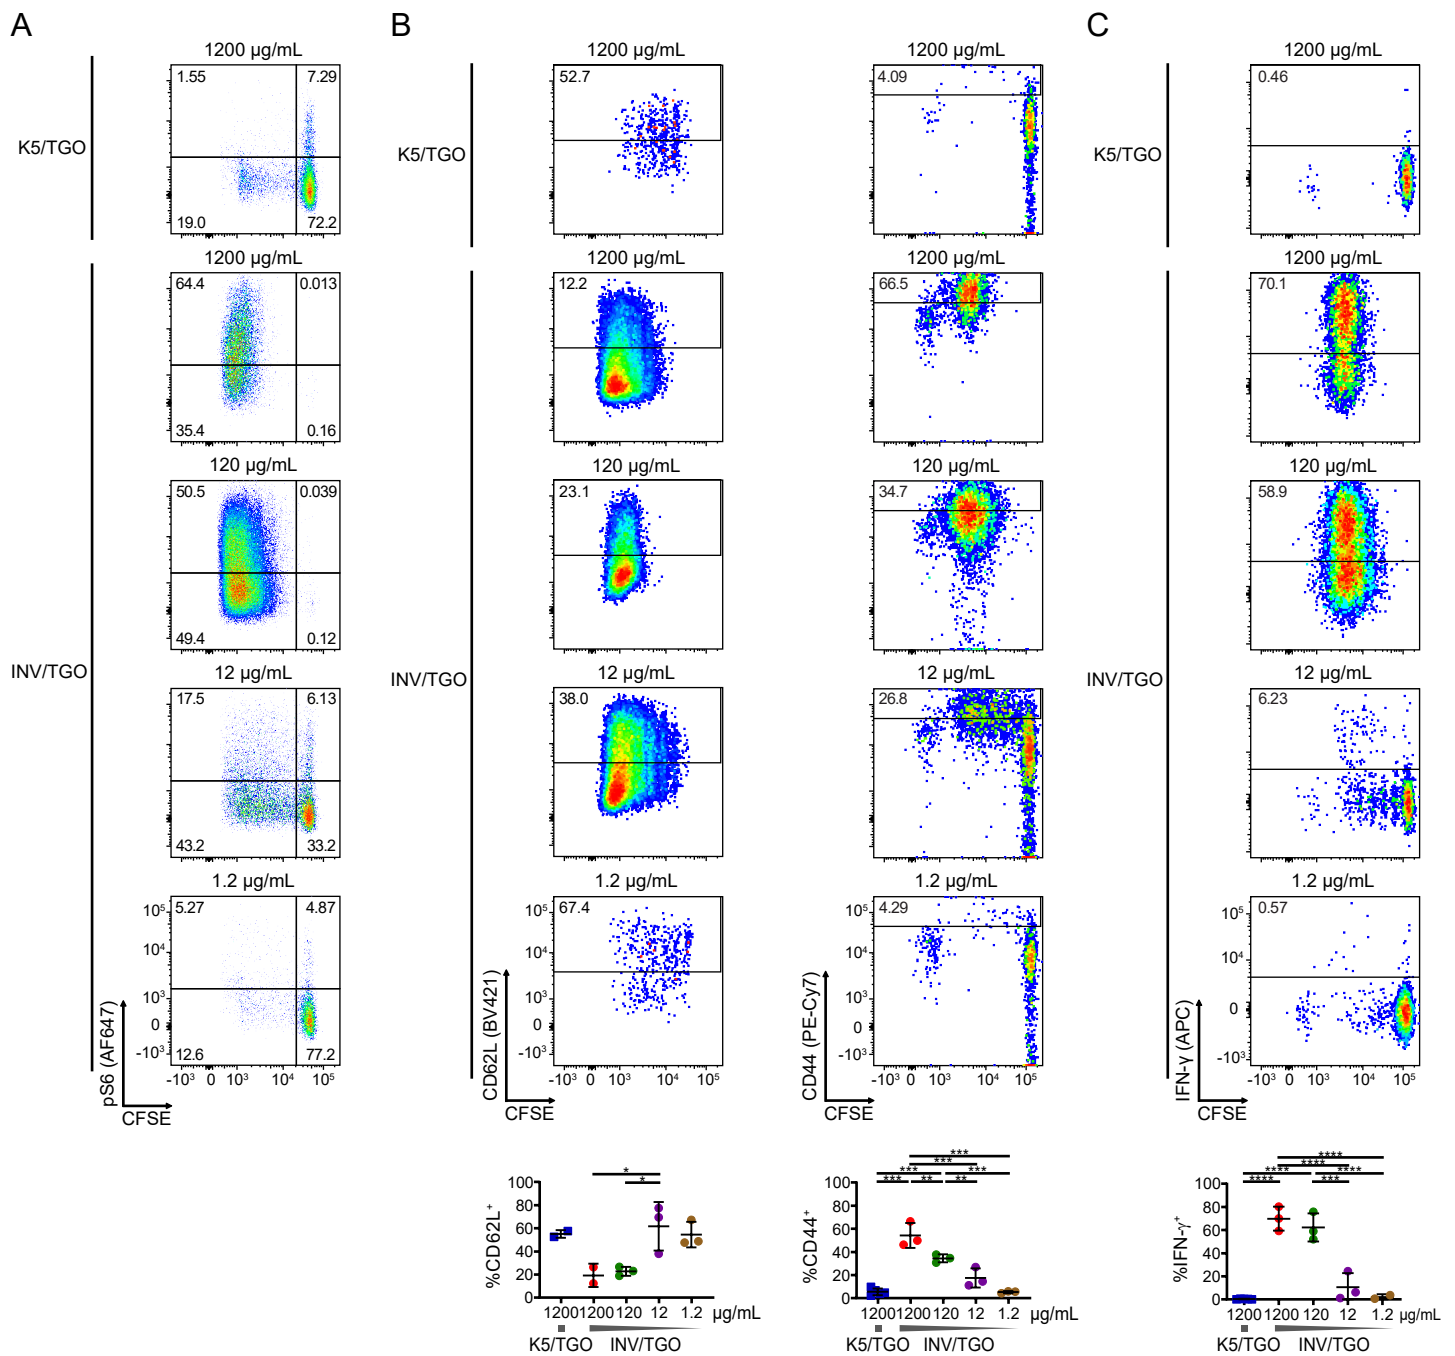

**Supplemental Figure 2: T cell activation and differentiation depends on dose of tissue antigen in INV/TGO mice.** OVA expression in the skin was induced by the indicated doses of dox (1200 – 1.2 µg/mL) and  $0.9 \cdot 2 \times 10^6$  CFSE-labeled LN cells from DO11.10 Rag2<sup>-/-</sup> mice were transferred into K5/TGO or INV/TGO mice. sdLNs were isolated 2-4 days after transfer and single-cell suspensions analyzed by flow cytometry either with immediate fixation ex vivo (A) or without fixation (B, C). (A) Representative flow plots of pS6 expression in DO11.10 cells. (B) Representative flow plots and percentages of CD62L<sup>+</sup> (left) and CD44<sup>+</sup> (right) DO11.10 cells (N ≥ 2/group). (C) Representative flow plots and percentages of IFN-γ producing DO11.10 cells (representative of 2 experiments, N ≥ 3/group in total). Mean and SD is shown.

**Table S1: Detailed list of antibodies and reagents**

| <b>Mouse treatment</b>                                |                              |                       |
|-------------------------------------------------------|------------------------------|-----------------------|
| <b>Reagent</b>                                        | <b>Company</b>               | <b>Catalog number</b> |
| doxycycline                                           | Sigma-Aldrich                | D9891                 |
| rapamycin                                             | Selleckchem                  | S1039                 |
| <b>Cell culture medium</b>                            |                              |                       |
| <b>Reagent</b>                                        | <b>Company</b>               | <b>Catalog number</b> |
| RPMI 1640                                             | Gibco                        | 31870074              |
| Fetal Bovine Serum (FBS)                              | Thermo Fisher                | 10500064              |
| Penicillin/streptomycin                               | Sigma-Aldrich                | P0781                 |
| L-Glutamine                                           | Gibco                        | A2916801              |
| NEAA                                                  | Gibco                        | 11140035              |
| Sodium-Pyruvate                                       | Sigma-Aldrich                | S8636                 |
| 2-Mercaptoethanol                                     | Gibco                        | 31350-010             |
| <b>Skin digestion</b>                                 |                              |                       |
| <b>Reagent</b>                                        | <b>Company</b>               | <b>Catalog number</b> |
| Collagenase XI from Clostridium histolyticum          | Sigma-Aldrich                | C9407                 |
| Hyaluronidase                                         | Sigma-Aldrich                | H3506                 |
| DNase                                                 | Sigma-Aldrich                | DN25                  |
| <b>Cellular activation</b>                            |                              |                       |
| <b>Reagent</b>                                        | <b>Company</b>               | <b>Catalog number</b> |
| PMA                                                   | Sigma-Aldrich                | P8139                 |
| Ionomycin                                             | Sigma-Aldrich                | I06434                |
| Brefeldin A                                           | Sigma-Aldrich                | B7651                 |
| <b>Flow cytometry</b>                                 |                              |                       |
| <b>Reagent</b>                                        | <b>Company</b>               | <b>Catalog number</b> |
| Bovine Serum Albumin (BSA)                            | Sigma-Aldrich                | A7030                 |
| DPBS                                                  | Gibco                        | 14190169              |
| Foxp3 / Transcription Factor Staining Buffer Set      | eBioscience                  | 00-5523-00            |
| Methanol                                              | Sigma-Aldrich                | 322415                |
| Paraformaldehyde                                      | Electron Microscopy Sciences | 15710                 |
| Pharm Lyse                                            | BD                           | 555899                |
| Anti-mouse CD152 APC (UC10-4B9)                       | eBioscience                  | 17-1522-82            |
| Anti-mouse CD25 PE (PC61.5)                           | eBioscience                  | 12-0251-82            |
| Anti-mouse CD3 eFluor 450 (17A2)                      | eBioscience                  | 48-0032-82            |
| Anti-mouse CD357 PE (DTA-1)                           | Tonbo biosciences            | 50-5874-U100          |
| Anti-mouse CD4 APC-eFluor 780 (GK1.5)                 | eBioscience                  | 47-0041-82            |
| Anti-mouse CD4 APC-eFluor 780 (OKT4)                  | eBioscience                  | 47-0048-42            |
| Anti-mouse CD4 FITC (GK1.5)                           | eBioscience                  | 11-0041-82            |
| Anti-mouse CD4 V500 (RM4-5)                           | BD                           | 560782                |
| Anti-mouse CD44 FITC (IM7)                            | eBioscience                  | 11-0441-82            |
| Anti-mouse CD45.1 APC-eFluor 780 (A20)                | eBioscience                  | 47-0453-82            |
| Anti-mouse CD45.1 FITC (A20)                          | eBioscience                  | 11-0453-82            |
| Anti-mouse CD62L APC-eFluor 780 (MEL-14)              | eBioscience                  | 47-0621-82            |
| Anti-mouse CD62L BV421 (MEL-14)                       | BD                           | 562910                |
| Anti-mouse CD90.1 APC-eFluor 780 (HIS51)              | eBioscience                  | 47-0900-82            |
| Anti-mouse CD90.1 FITC (OX-7)                         | BD                           | 554897                |
| Anti-mouse CD90.1 PerCP (OX-7)                        | BD                           | 557266                |
| Anti-mouse DO11.10 TCR biotin (KJ1-26)                | eBioscience                  | 13-5808-82            |
| Anti-mouse DO11.10 TCR FITC (KJ1-26)                  | eBioscience                  | 11-5808-82            |
| Anti-mouse DO11.10 TCR PE (KJ1-26)                    | eBioscience                  | 12-5808-82            |
| Anti-mouse DO11.10 TCR PerCP-eFluor 710 (KJ1-26)      | eBioscience                  | 46-5808-82            |
| Anti-mouse FOXP3 eFluor 450 (FJK-16s)                 | eBioscience                  | 48-5773-82            |
| Anti-mouse FOXP3 PE (NRRF-30)                         | eBioscience                  | 12-4771-82            |
| Anti-mouse IFN- $\gamma$ APC (XMG1.2)                 | eBioscience                  | 17-7311-82            |
| Anti-mouse IL-2 PE (JES6-5H4)                         | eBioscience                  | 12-7021-82            |
| Anti-mouse TNF- $\alpha$ PE-Cy7 (MP6-XT22)            | eBioscience                  | 25-7321-82            |
| Carboxyfluorescein succinimidyl ester (CFSE)          | eBioscience                  | 65-0850-84            |
| Fixable Viability Dye eFluor 506                      | eBioscience                  | 65-0866-14            |
| Fixable Viability Dye eFluor 520                      | eBioscience                  | 65-0867-18            |
| Fixable Viability Dye eFluor 780                      | eBioscience                  | 65-0865-14            |
| Goat anti-Rabbit IgG (H+L) Alexa Fluor 647            | Invitrogen                   | A-21245               |
| Phospho-S6 Ribosomal Protein (Ser235/236) (2F9)       | Cell Signaling Technology    | 4856                  |
| Streptavidin PE-Cy7                                   | eBioscience                  | 25-4317-82            |
| <b>RNA isolation and RT-PCR</b>                       |                              |                       |
| <b>Reagent</b>                                        | <b>Company</b>               | <b>Catalog number</b> |
| gDNA eliminator column                                | Quiagen                      | 74134                 |
| iScript <sup>TM</sup> reverse transcription super mix | Bio-Rad                      | 1708841               |
| GoTaq qPCR master mix 2X                              | Promega                      | A600                  |
